# Supplementary material for: Adopting machine learning to automatically identify candidate patients for corneal refractive surgery
Source: PubMed Central journal article supplement (PMC6586803; doi:10.1038/s41746-019-0135-8), 2019-06-20
Supplement: 41746_2019_135_MOESM2_ESM.pdf [file 41746_2019_135_MOESM2_ESM.pdf]

## **Online-only supplements**

**Supplementary Table 1** Subjects' data used to build the machine learning models

**Supplementary Table 2** Comparison between candidates and contraindication cases

**Supplementary Table 3** Classification performance of machine learning models to predict candidates for corneal refractive surgery in the internal validation set

**Supplementary Fig. 1** Twenty features were selected by information gain ranking to predict candidates for corneal refractive surgery. This graph shows the results from the 10-fold cross-validation procedure. CCT, central corneal thickness; CDVA, corrected distance visual acuity; K1, keratometry in the flattest meridian; K2, keratometry in the steepest meridian.

**Supplementary Video** This video demonstrates the final ensemble machine learning model as it appears during analysis.

## Supplemental materials

### Adopting Machine Learning to Automatically Identify Candidate Patients for Corneal Refractive Surgery

Tae Keun Yoo, MD, Ik Hee Ryu, MD, Geunyoung Lee, BS, Youngnam Kim, MS, Jin Kuk Kim, MD, PhD, In Sik Lee, MD, PhD, Jung Sub Kim, MD, Tyler Hyungtaek Rim, MD, MBA

**Supplementary Table 1. Subjects' data used to build the machine learning models**

| Category              | Total number | Features                                                                                                                                                                                                                                                                                                                                                                                                                                                                                                                                                                                                                                                                                                                                                                                                                                                                                                                                                                                                                                                                                                                                                                                                                                                                                                                                                                                                                                                              |
|-----------------------|--------------|-----------------------------------------------------------------------------------------------------------------------------------------------------------------------------------------------------------------------------------------------------------------------------------------------------------------------------------------------------------------------------------------------------------------------------------------------------------------------------------------------------------------------------------------------------------------------------------------------------------------------------------------------------------------------------------------------------------------------------------------------------------------------------------------------------------------------------------------------------------------------------------------------------------------------------------------------------------------------------------------------------------------------------------------------------------------------------------------------------------------------------------------------------------------------------------------------------------------------------------------------------------------------------------------------------------------------------------------------------------------------------------------------------------------------------------------------------------------------|
| Demographics & Survey | 40           | Age (continuous)<br>Sex (binary)<br>Before_Surgery_Glasses (binary)<br>Before_Surgery_Hard_Lens (binary)<br>Before_Surgery_Soft_Lens (binary)<br>Before_Surgery_None (binary)<br>Occupation_Sports (binary)<br>Occupation_Driver (binary)<br>Occupation_Computer_or_Smartphone (binary)<br>Anticipated_Surgery_LASIK (binary)<br>Anticipated_Surgery_LASEK (binary)<br>Anticipated_Surgery_SMILE (binary)<br>Anticipated_Surgery_ICL (binary)<br>Anticipated_Surgery_None (binary)<br>Anticipated_Recovery_One_Day (binary)<br>Anticipated_Recovery_Three_Days (binary)<br>Anticipated_Recovery_One_Week (binary)<br>Anticipated_Recovery_One_Month (binary)<br>Anticipated_Recovery_None (binary)<br>Plan_After_Surgery_Study_Abroad (binary)<br>Plan_After_Surgery_Employment (binary)<br>Plan_After_Surgery_Military (binary)<br>Plan_After_Surgery_Surgery (binary)<br>Plan_After_Surgery_None (binary)<br>Concern_Complication (binary)<br>Concern_Visual_Acuity (binary)<br>Concern_Management (binary)<br>Concern_Recovery (binary)<br>Concern_Money (binary)<br>Concern_None (binary)<br>Dry_Eye_Symptom_Severe (binary)<br>Dry_Eye_Symptom_Moderate (binary)<br>Dry_Eye_Symptom_Mild (binary)<br>Dry_Eye_Symptom_None (binary)<br>History_Metabolic_Disease (binary)<br>History_Glaucoma_Or_Retinal_Disorder (binary)<br>History_Keloid_Or_Atopic_Dermatitis (binary)<br>History_Recent_Delivery (binary)<br>History_Other (binary)<br>History_None (binary) |

**eTable 1. Subjects' data used to build the machine learning models (continued)**

| Category                                  | Total number        | Features                                                                                                                                                                                                                                                                                                                                                                                                                                                                                                                                                                                                                                                                                                                                                                                                                                                                                                                                                                                                                                                                                                                                                                                                                                                                                                                                                                                                                                                                                                                                                                                                                                                                                                                                                              |
|-------------------------------------------|---------------------|-----------------------------------------------------------------------------------------------------------------------------------------------------------------------------------------------------------------------------------------------------------------------------------------------------------------------------------------------------------------------------------------------------------------------------------------------------------------------------------------------------------------------------------------------------------------------------------------------------------------------------------------------------------------------------------------------------------------------------------------------------------------------------------------------------------------------------------------------------------------------------------------------------------------------------------------------------------------------------------------------------------------------------------------------------------------------------------------------------------------------------------------------------------------------------------------------------------------------------------------------------------------------------------------------------------------------------------------------------------------------------------------------------------------------------------------------------------------------------------------------------------------------------------------------------------------------------------------------------------------------------------------------------------------------------------------------------------------------------------------------------------------------|
| Corneal tomography - Pentacam (both eyes) | 80                  | Pentacam_Pupil_Diameter (continuous)<br>Pentacam_Anterior_Chamber_Depth (continuous)<br>Pentacam_Angle (continuous)<br>Pentacam_Chamber_Volume (continuous)<br>Pentacam_Keratometric_Power_Deviation (continuous)<br>Pentacam_Corea_Volume (continuous)<br>Pentacam_K_Max_y (continuous)<br>Pentacam_K_max_x (continuous)<br>Pentacam_K_max_pachy (continuous)<br>Pentacam_Thinnest_Y (continuous)<br>Pentacam_Thinnest_X (continuous)<br>Pentacam_Thinnest_CCT (continuous)<br>Pentacam_Pachy_Apex_Y_Position (continuous)<br>Pentacam_Pachy_Apex_X_Position (continuous)<br>Pentacam_Pachy_Apex_CCT (continuous)<br>Pentacam_Pupil_Center_Y (continuous)<br>Pentacam_Pupil_Center_X (continuous)<br>Pentacam_Pupil_Center_CCT (continuous)<br>Pentacam_Corneal_Back_Rmin (continuous)<br>Pentacam_Corneal_Back_Rper (continuous)<br>Pentacam_Corneal_Back_ecc (continuous)<br>Pentacam_Corneal_Back_Astig (continuous)<br>Pentacam_Corneal_Back_Axis (continuous)<br>Pentacam_Corneal_Back_K_mean (continuous)<br>Pentacam_Corneal_Back_R_mean (continuous)<br>Pentacam_Corneal_Back_K2 (continuous)<br>Pentacam_Corneal_Back_R_Vertical (continuous)<br>Pentacam_Corneal_Back_K1 (continuous)<br>Pentacam_Corneal_Back_R_Horizontal (continuous)<br>Pentacam_Corneal_Front_Rmin (continuous)<br>Pentacam_Corneal_Front_Rper (continuous)<br>Pentacam_Corneal_Front_ecc (continuous)<br>Pentacam_Corneal_Front_Astig (continuous)<br>Pentacam_Corneal_Front_Axis (continuous)<br>Pentacam_Corneal_Front_K_mean (continuous)<br>Pentacam_Corneal_Front_R_mean (continuous)<br>Pentacam_Corneal_Front_K2 (continuous)<br>Pentacam_Corneal_Front_R_Vertical (continuous)<br>Pentacam_Corneal_Front_K1 (continuous)<br>Pentacam_Corneal_Front_R_Horizontal (continuous) |
| Ophthalmic examination (both eyes)        | 22                  | Spherical_Equivalent (continuous)<br>Spherical_Diopter (continuous)<br>Cylinder_Diopter (continuous)<br>Cylinder_Axis (continuous)<br>CDVA (logMAR) (continuous)<br>Pupil_Diameter (continuous)<br>IOP (continuous)<br>CCT (continuous)<br>Anterior_Chamber_Depth (continuous)<br>WTW (continuous)<br>NIBUT (continuous)                                                                                                                                                                                                                                                                                                                                                                                                                                                                                                                                                                                                                                                                                                                                                                                                                                                                                                                                                                                                                                                                                                                                                                                                                                                                                                                                                                                                                                              |
| <b>Total</b>                              | <b>142 features</b> |                                                                                                                                                                                                                                                                                                                                                                                                                                                                                                                                                                                                                                                                                                                                                                                                                                                                                                                                                                                                                                                                                                                                                                                                                                                                                                                                                                                                                                                                                                                                                                                                                                                                                                                                                                       |

**Supplementary Table 2. Comparison between candidates and contraindication cases**

|                                | Candidates for surgery | Contraindication cases | <i>P</i> Value <sup>a</sup> |
|--------------------------------|------------------------|------------------------|-----------------------------|
| <b>Training set</b>            |                        |                        |                             |
| Number                         | 9557                   | 1004                   |                             |
| Age (years)                    | 27.8 ± 5.9             | 33.8 ± 7.7             | <.001                       |
| Sex, female (%)                | 5077 (53.1)            | 532 (53.0)             | .935                        |
| Spherical equivalent (Diopter) | -4.53 ± 2.00           | -7.82 ± 4.99           | <.001                       |
| CDVA (logMAR)                  | -0.016 ± 0.036         | 0.017 ± 0.114          | <.001                       |
| IOP (mmHg)                     | 15.2 ± 2.59            | 15.2 ± 23.2            | .897                        |
| Central corneal thickness (µm) | 542.9 ± 30.58          | 501.3 ± 41.2           | <.001                       |
| NIBUT (seconds)                | 6.93 ± 6.71            | 5.12 ± 3.60            | <.001                       |
| <b>Internal validation set</b> |                        |                        |                             |
| Number                         | 2389                   | 251                    |                             |
| Age (years)                    | 27.7 ± 6.1             | 33.6 ± 7.9             | <.001                       |
| Sex, female (%)                | 1242 (52.0)            | 132 (52.6)             | .856                        |
| Spherical equivalent (Diopter) | -4.53 ± 2.00           | -7.82 ± 4.99           | <.001                       |
| CDVA (logMAR)                  | -0.017 ± 0.037         | 0.015 ± 0.119          | <.001                       |
| IOP (mmHg)                     | 15.3 ± 3.6             | 15.2 ± 23.2            | .923                        |
| Central corneal thickness (µm) | 542.8 ± 30.97          | 501.7 ± 42.2           | <.001                       |
| NIBUT (seconds)                | 6.91 ± 6.63            | 5.10 ± 3.44            | <.001                       |
| <b>External validation set</b> |                        |                        |                             |
| Number                         | 4904                   | 375                    |                             |
| Age (years)                    | 25.7 ± 6.4             | 33.8 ± 8.4             | <.001                       |
| Sex, female (%)                | 2675 (54.6)            | 204 (54.4)             | .956                        |
| Spherical equivalent (Diopter) | -4.57 ± 2.12           | -7.81 ± 5.10           | <.001                       |
| CDVA (logMAR)                  | -0.001 ± 0.036         | 0.019 ± 0.127          | <.001                       |
| IOP (mmHg)                     | 15.2 ± 3.1             | 15.1 ± 26.2            | .917                        |
| Central corneal thickness (µm) | 545.1 ± 32.8           | 509.8 ± 45.9           | <.001                       |
| NIBUT (seconds)                | 6.94 ± 6.71            | 5.40 ± 3.60            | <.001                       |

Abbreviations: CDVA, corrected distance visual acuity; IOP, intraocular pressure; NIBUT, non-invasive break up time.<sup>a</sup> Comparison using the one-way ANOVA test and Chi-square test.

**Supplementary Table 3. Classification performance of machine learning models to predict candidates for corneal refractive surgery in the internal validation set**

|                            | AUC (95% CI)           | Accuracy (%)<br>(95% CI) | Sensitivity (%)<br>(95% CI) | Specificity (%)<br>(95% CI) | <i>P</i> Value <sup>a</sup> |
|----------------------------|------------------------|--------------------------|-----------------------------|-----------------------------|-----------------------------|
| <b>Internal validation</b> |                        |                          |                             |                             |                             |
| SVM                        | 0.963<br>(0.955-0.970) | 90.6<br>(89.5-91.7)      | 90.7<br>(89.5-91.8)         | 90.0<br>(85.7-93.5)         | .085                        |
| ANN                        | 0.970<br>(0.962-0.976) | 92.7<br>(91.7-93.7)      | 93.1<br>(92.0-94.1)         | 89.2<br>(84.7-92.8)         | .357                        |
| RF                         | 0.976<br>(0.969-0.981) | 91.4<br>(90.3-92.4)      | 91.3<br>(90.3-92.4)         | 92.4<br>(88.4-95.4)         | Reference                   |
| AdaBoost                   | 0.972<br>(0.965-0.978) | 92.1<br>(90.9-93.1)      | 92.1<br>(90.9-93.2)         | 91.6<br>(87.5-94.8)         | .591                        |
| LASSO                      | 0.930<br>(0.920-0.940) | 84.7<br>(83.2-86.0)      | 84.5<br>(82.9-85.9)         | 86.5<br>(81.6-90.4)         | <.001                       |
| Ensemble                   | 0.983<br>(0.977-0.987) | 94.1<br>(93.2-95.0)      | 94.3<br>(93.3-95.2)         | 92.8<br>(88.9-95.7)         | .223                        |
| PTA                        | 0.808<br>(0.792-0.822) | 85.3<br>(83.9-86.6)      | 87.1<br>(85.7-88.4)         | 68.5<br>(62.4-74.2)         | <.001                       |
| Randleman score            | 0.885<br>(0.872-0.897) | 86.6<br>(85.2-87.8)      | 87.6<br>(86.2-88.9)         | 76.5<br>(70.7-81.6)         | <.001                       |
| <b>External validation</b> |                        |                          |                             |                             |                             |
| SVM                        | 0.958<br>(0.952-0.963) | 91.5<br>(90.7-92.2)      | 91.7<br>(90.9-92.5)         | 88.0<br>(84.3-91.1)         | .459                        |
| ANN                        | 0.959<br>(0.953-0.964) | 90.6<br>(89.7-91.3)      | 90.7<br>(89.9-91.5)         | 88.0<br>(89.9-91.5)         | .503                        |
| RF                         | 0.967<br>(0.962-0.972) | 92.9<br>(92.2-93.6)      | 93.3<br>(92.5-93.9)         | 88.0<br>(84.3-91.1)         | Reference                   |
| AdaBoost                   | 0.964<br>(0.958-0.969) | 90.6<br>(89.8-91.4)      | 90.6<br>(89.8-91.4)         | 90.4<br>(86.9-93.2)         | .612                        |
| LASSO                      | 0.913<br>(0.905-0.920) | 85.5<br>(84.5-86.4)      | 85.7<br>(84.7-86.7)         | 82.7<br>(78.5-86.4)         | <.001                       |
| Ensemble                   | 0.972<br>(0.967-0.976) | 93.4<br>(92.7-94.1)      | 93.7<br>(93.0-94.4)         | 89.3<br>(85.8-92.3)         | .226                        |
| PTA                        | 0.804<br>(0.958-0.969) | 80.9<br>(79.9-82.0)      | 81.7<br>(80.6-82.8)         | 70.9<br>(66.1-75.5)         | <.001                       |
| Randleman score            | 0.893<br>(0.884-0.901) | 86.9<br>(85.9-87.8)      | 87.5<br>(86.6-88.5)         | 77.6<br>(73.0-81.7)         | <.001                       |

Abbreviations: ANN, artificial neural networks; AUC, area under curve; CI, confidence interval; LASSO, least absolute shrinkage and selection operator; PTA, percentage of tissue ablated; RF, random forest; SVM, support vector machine.

<sup>a</sup> Comparison of receiver operating characteristics curves with the best single technique (random forest with feature selection) according to the Delong test.

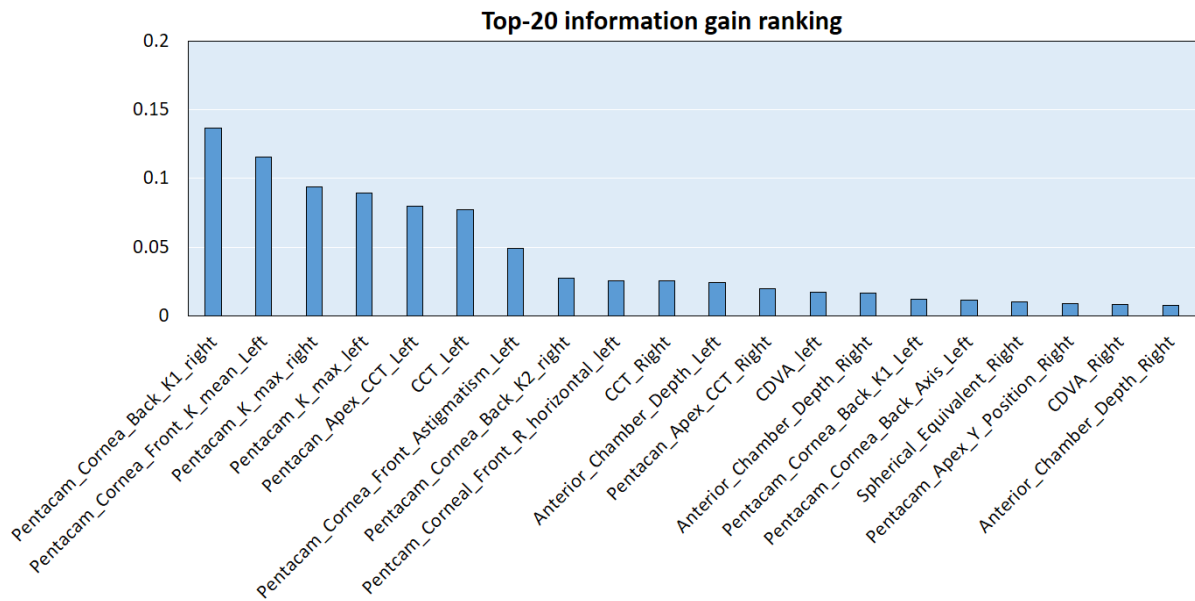

**Supplementary Fig. 1. Twenty features were selected by information gain ranking to predict candidates for corneal refractive surgery.**

This graph shows the results from the 10-fold cross-validation procedure. CCT, central corneal thickness; CDVA, corrected distance visual acuity; K1, keratometry in the flattest meridian; K2, keratometry in the steepest meridian
